# Supplementary material for: Identification of CYFIP2 Arg87Cys Ligands via In Silico and In Vitro Approaches
Source: MDPI journal article supplement (doi:10.3390/biomedicines12030479), 2024-02-21
Supplement: s1 [file s1]

# Identification of CYFIP2 Arg87Cys ligands by *in silico* and *in vitro* approaches

Ísis Venturi Biembengut <sup>1</sup> Emanuella de Castro Andreassa <sup>1</sup> and Tatiana A. C. B. de Souza <sup>1,\*</sup>

<sup>1</sup> Laboratory for Structural and Computational Proteomics, Carlos Chagas Institute, Fundação Oswaldo Cruz Paraná (Fiocruz-PR), Curitiba 80320-290, Brazil

\* Correspondence: tatiana.brasil@fiocruz.br

## 1. Supplementary Materials

**Table S2.** List of selected compounds after the initial screening.

| ID | Compound Name                | Database | Compound CID (Pubchem ID) | Binding Affinity (kcal/mol) – CYFIP2 WT | Binding Affinity (Kcal/mol) - CYFIP2 Arg87Cys |
|----|------------------------------|----------|---------------------------|-----------------------------------------|-----------------------------------------------|
| 1  | Remdesivir                   | Drugbank | 121304016                 | -6.0                                    | -8.2                                          |
| 2  | EXPT02813                    | Drugbank | 17754151                  | -5.6                                    | -7.3                                          |
| 3  | Mdl-29951                    | Drugbank | 446916                    | -5.7                                    | -7.1                                          |
| 4  | EXPT01499                    | Drugbank | 448471                    | -5.2                                    | -6.6                                          |
| 5  | Branebrutinib                | Drugbank | 121293929                 | -6.1                                    | -7.4                                          |
| 6  | Des(carbamimidoyl) zanamivir | Drugbank | 445533                    | -5.4                                    | -6.7                                          |
| 7  | EXPT02428                    | Drugbank | 448249                    | -6.3                                    | -7.4                                          |
| 8  | AZD-1981                     | Drugbank | 11292191                  | -6.4                                    | -7.5                                          |
| 9  | EXPT02245                    | Drugbank | 5288855                   | -5.5                                    | -6.6                                          |

|    |                              |          |          |      |      |
|----|------------------------------|----------|----------|------|------|
| 10 | Porfiromycin                 | Drugbank | 13116    | -5.6 | -6.6 |
| 11 | EXPT01096                    | Drugbank | 461279   | -5.6 | -6.6 |
| 12 | Macelignan                   | Drugbank | 10404245 | -7.5 | -6.0 |
| 13 | Bevenopran                   | Drugbank | 10452732 | -7.6 | -6.0 |
| 14 | MBX-8025                     | Drugbank | 11236126 | -7.4 | -5.6 |
| 15 | DB08322                      | Drugbank | 11669698 | -7.9 | -5.9 |
| 16 | DB08013                      | Drugbank | 130188   | -8.2 | -6.4 |
| 17 | DB08784                      | Drugbank | 1432578  | -7.9 | -6.1 |
| 18 | DB07355                      | Drugbank | 14368760 | -6.5 | -4.8 |
| 19 | DB08297                      | Drugbank | 150889   | -7.0 | -6.0 |
| 20 | Melperone                    | Drugbank | 15387    | -6.8 | -5.7 |
| 21 | (S)-Fluoxetine               | PDE3     | 1548968  | -7.4 | -6.4 |
| 22 | Arverapamil                  | Drugbank | 15593907 | -7.1 | -5.8 |
| 23 | DB08193                      | Drugbank | 15876    | -6.7 | -5.7 |
| 24 | DB08401                      | Drugbank | 16741209 | -7.2 | -5.8 |
| 25 | Cobiprostone                 | Drugbank | 16757521 | -7.1 | -5.9 |
| 26 | Hydroxyprogesterone caproate | Drugbank | 169870   | -7.4 | -6.4 |
| 27 | DB07782                      | Drugbank | 1722     | -7.4 | -6.0 |
| 28 | Proxibarbal                  | Drugbank | 17336    | -6.7 | -5.7 |
| 29 | Dobesilic acid               | Drugbank | 17507    | -6.9 | -5.7 |
| 30 | Bis-Benzamidine              | Drugbank | 17753851 | -7.8 | -6.4 |
| 31 | Etalocib                     | Drugbank | 177941   | -8.5 | -6.4 |
| 32 | EXPT01529                    | Drugbank | 188347   | -7.4 | -6.1 |
| 33 | Ramelteon                    | PDE3     | 208902   | -7.0 | -6.0 |
| 34 | Idalopirdine                 | Drugbank | 21071390 | -8.3 | -6.1 |
| 35 | Capromorelin                 | Drugbank | 216208   | -7.8 | -6.4 |
| 36 | DB07269                      | Drugbank | 23653503 | -7.6 | -5.7 |

|    |                         |          |           |      |      |
|----|-------------------------|----------|-----------|------|------|
| 37 | Carvedilol              | Drugbank | 2585      | -7.3 | -6.3 |
| 38 | Diphenidol              | Drugbank | 3055      | -7.8 | -6.3 |
| 39 | Arformoterol            | Drugbank | 3083544   | -7.0 | -5.7 |
| 40 | EXPT00994               | Drugbank | 445383    | -8.5 | -6.4 |
| 41 | EXPT01967               | Drugbank | 445569    | -7.9 | -6.0 |
| 42 | EXPT00747               | Drugbank | 446783    | -7.0 | -5.8 |
| 43 | EXPT02408               | Drugbank | 447049    | -7.8 | -6.1 |
| 44 | EXPT00813               | Drugbank | 5287870   | -7.7 | -6.2 |
| 45 | EXPT01301               | Drugbank | 65070     | -7.4 | -6.4 |
| 46 | EXPT01184               | Drugbank | 65103     | -7.6 | -6.3 |
| 47 | Aminoglutethimide       | PDE3     | 9UQ       | -6.9 | -5.9 |
| 48 | Nisoldipine             | PDE3     | 4499      | -5.4 | -6.4 |
| 49 | Protirelin              | PDE3     | 638678    | -6.7 | -8.1 |
| 50 | Pomalidomide            | Drugbank | 134780    | -7.0 | -8.2 |
| 51 | Cyprenorphine           | Drugbank | 20054882  | -6.9 | -8.0 |
| 52 | N-Acetylglucosamine     | Drugbank | 1738118   | -4.4 | -6.3 |
| 53 | Misoprostol             | PDE3     | 5282381   | -6.6 | -5.5 |
| 54 | Epinephrine             | PDE3     | 5816      | -6.5 | -5.5 |
| 55 | Dexmedetomidine         | PDE3     | 5311068   | -7.0 | -5.9 |
| 56 | Minocycline             | PDE3     | 54675783  | -7.0 | -8.1 |
| 57 | Ataciguat               | Drugbank | 213037    | -8.1 | -9.2 |
| 58 | Sulfamazone             | Drugbank | 187764    | -8.2 | -9.2 |
| 59 | Tipifarnib              | Drugbank | 159324    | -7.6 | -8.9 |
| 60 | Experimental            | Drugbank | 6323200   | -7.4 | -8.6 |
| 61 | Alisertib               | Drugbank | 24771867  | -7.5 | -8.6 |
| 62 | BMS-986158              | Drugbank | 118196485 | -7.3 | -8.3 |
| 63 | N,O-DIDANSYL-L-TYROSINE | Drugbank | 446468    | -7.0 | -8.1 |

---

|    |             |          |        |      |      |
|----|-------------|----------|--------|------|------|
| 64 | Torcetrapib | Drugbank | 159325 | -7.0 | -8.0 |
| 65 | Maropitant  | Drugbank | 204108 | -6.5 | -7.7 |

---

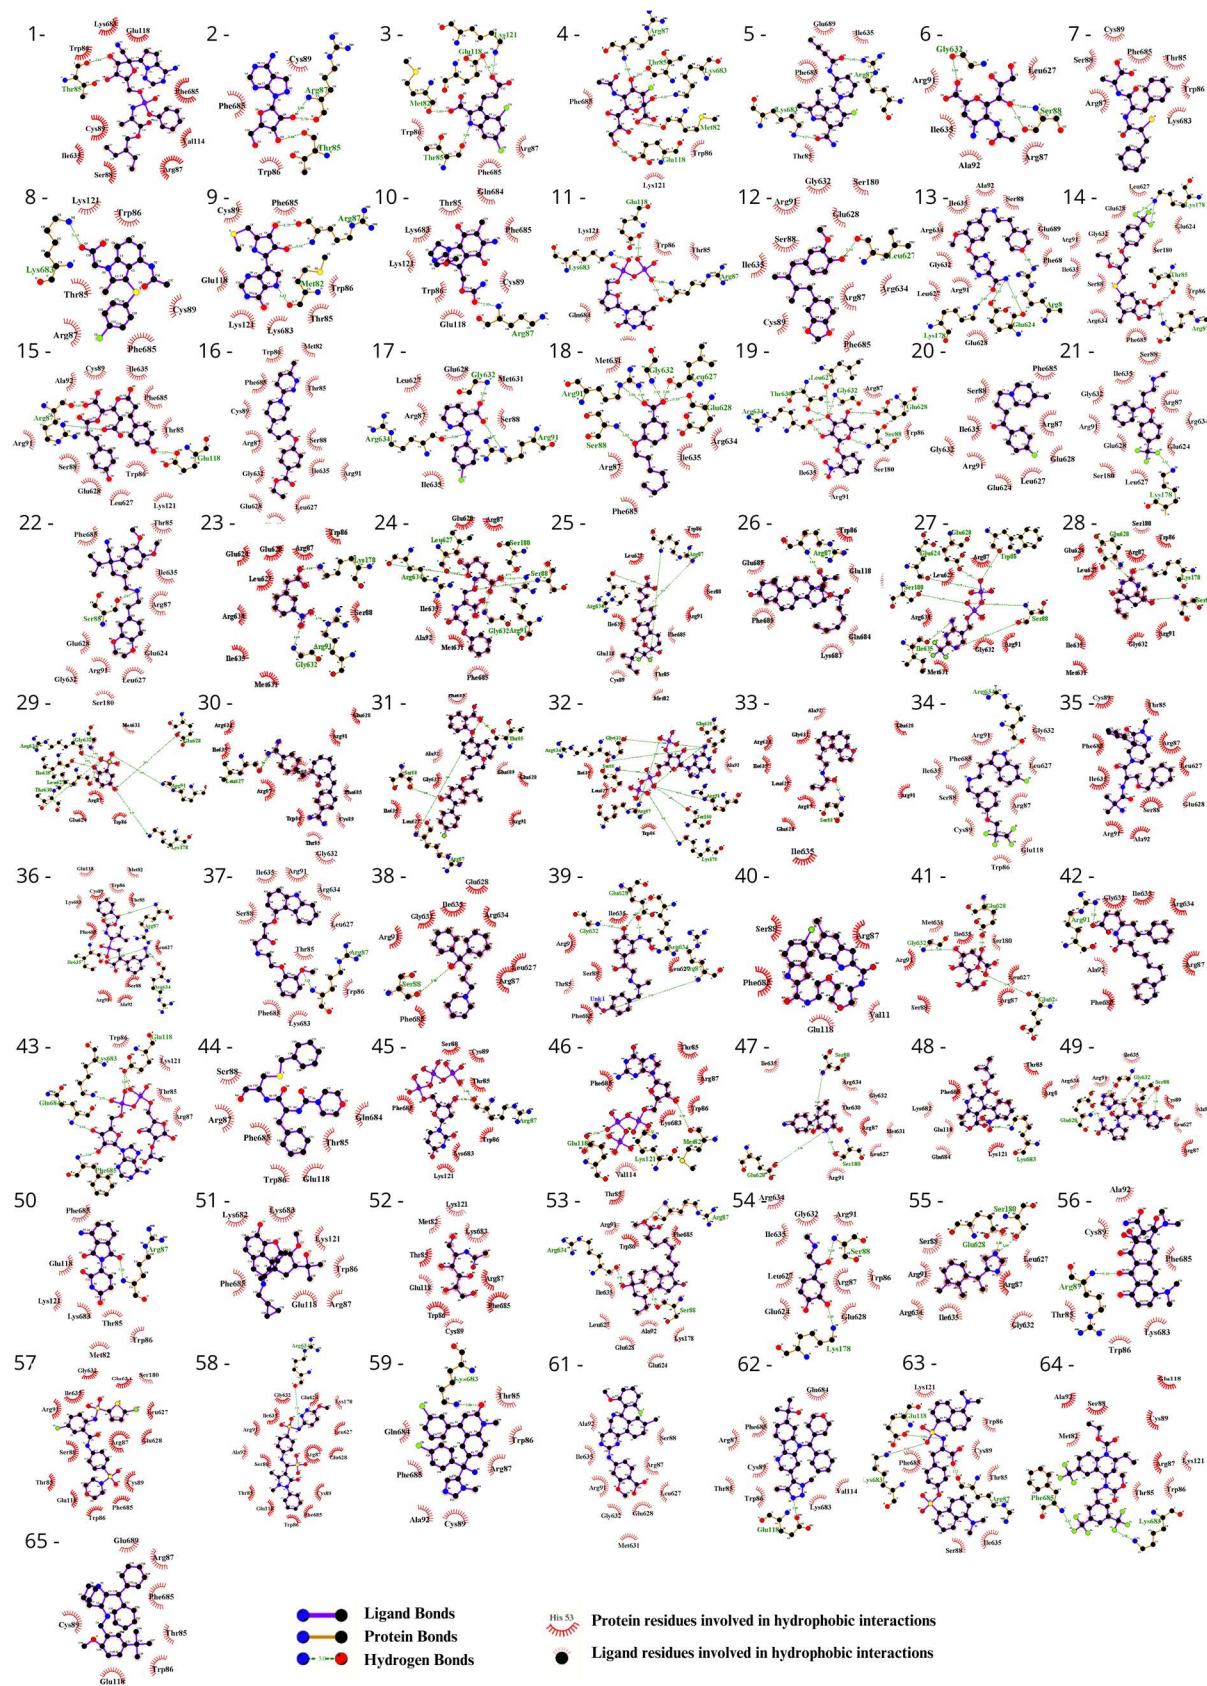

**Figure S1.** Evaluation in Ligplot of the 65 ligands found in the initial screening at the highest affinity position in docking with the CYFIP2 WT protein. The numbers follow the molecules IDs in table S2.



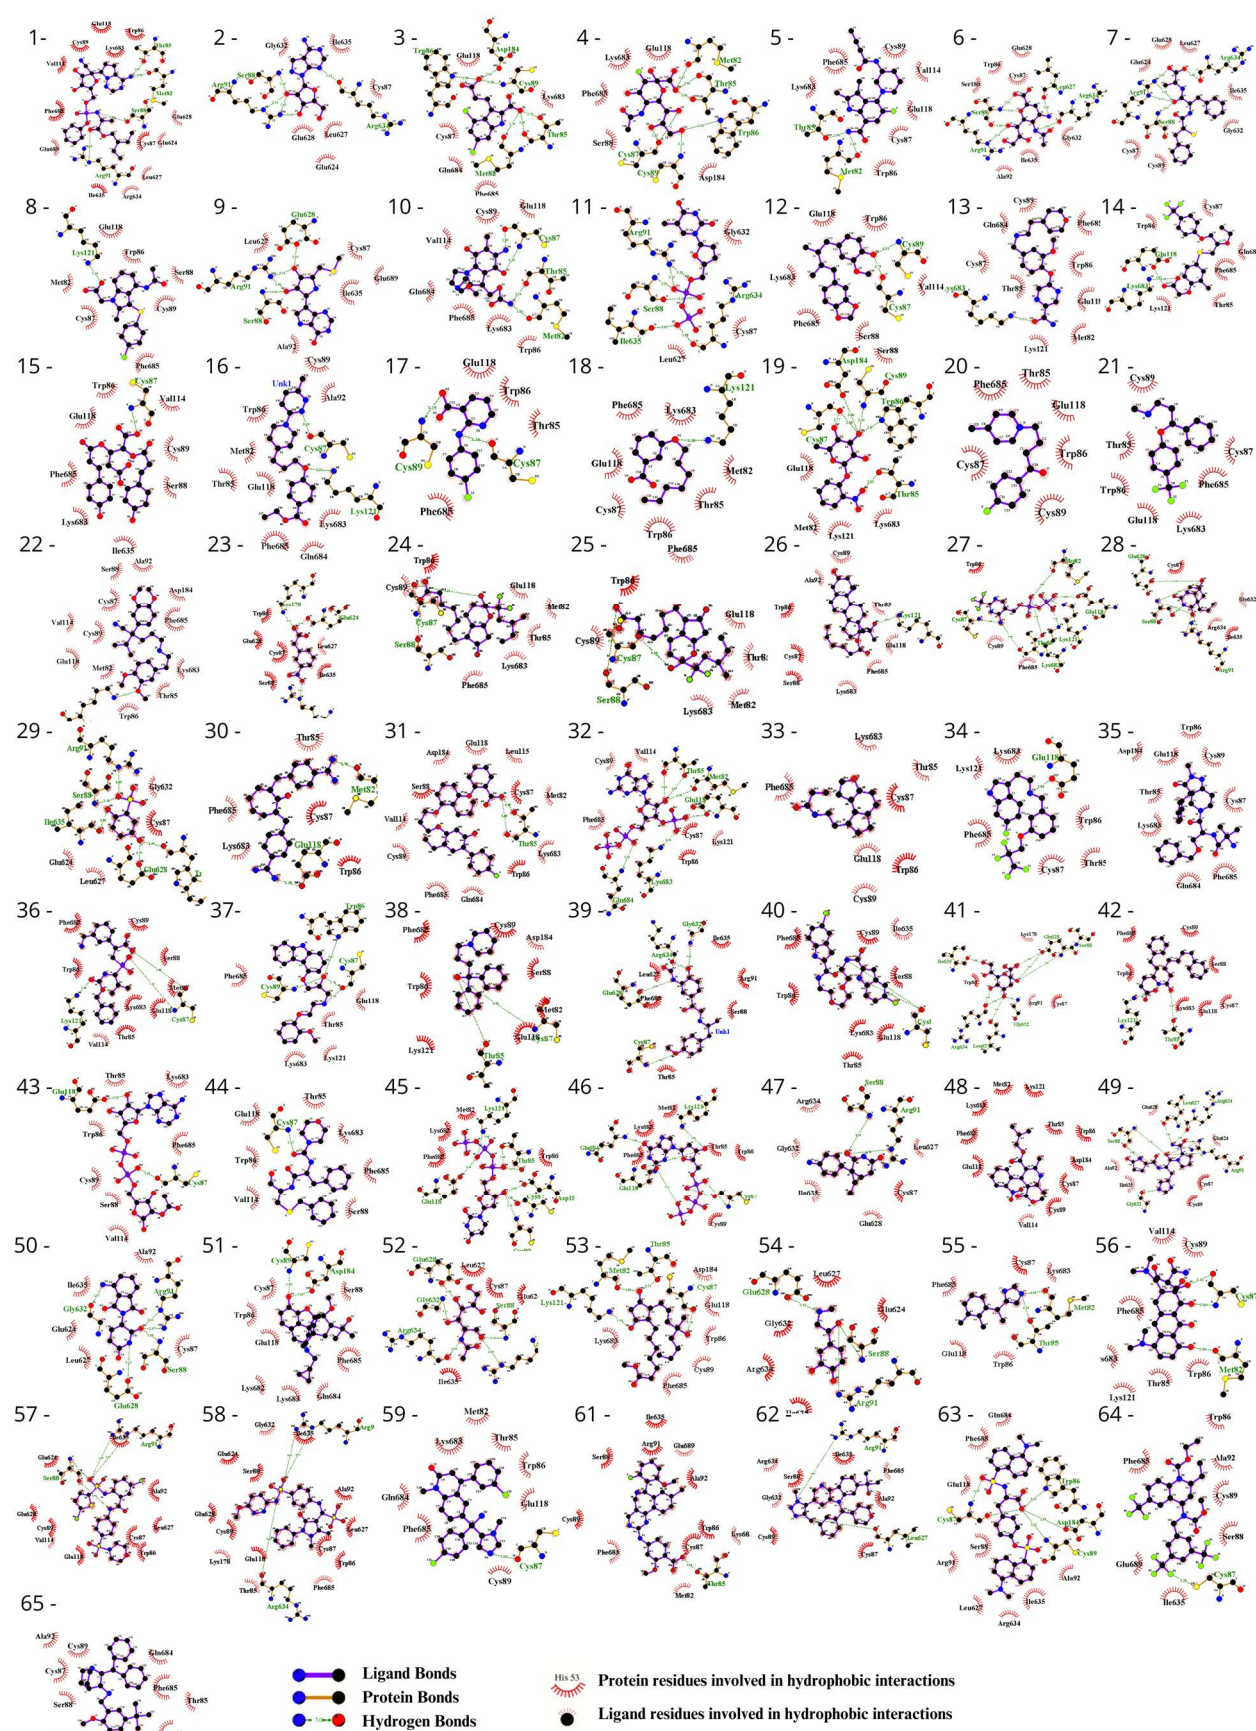

**Figure S2.** Evaluation in Ligplot of the 65 ligands found in the initial screening at the highest affinity position in docking with the CYFIP2 Arg87Cys protein. The numbers follow the molecules IDs in table S2.



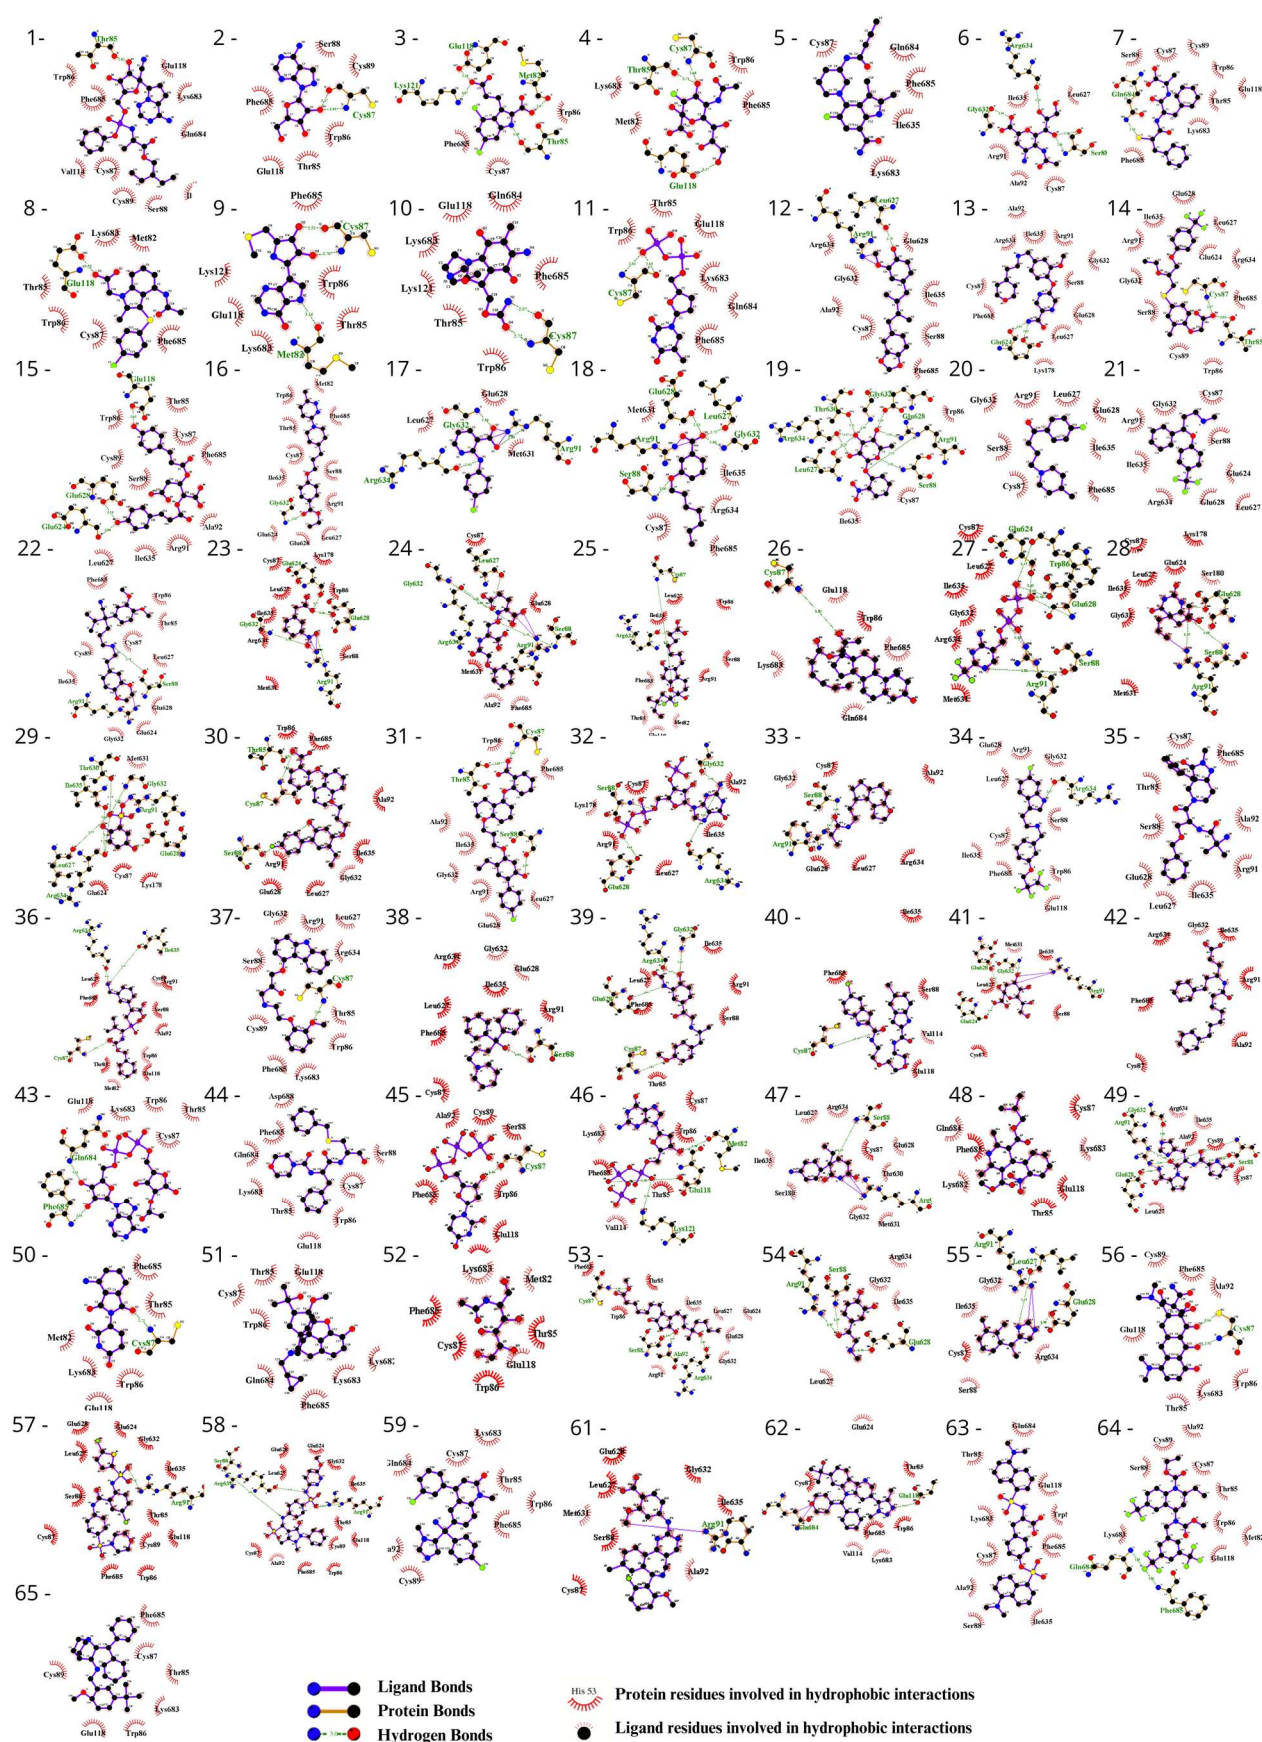

**Figure S3.** Evaluation in Ligplot of the 65 ligands found in the initial screening at the highest affinity position in docking with the CYFIP2 WT protein against the CYFIP2 Arg87Cys protein. The numbers follow the molecules IDs in table S2.



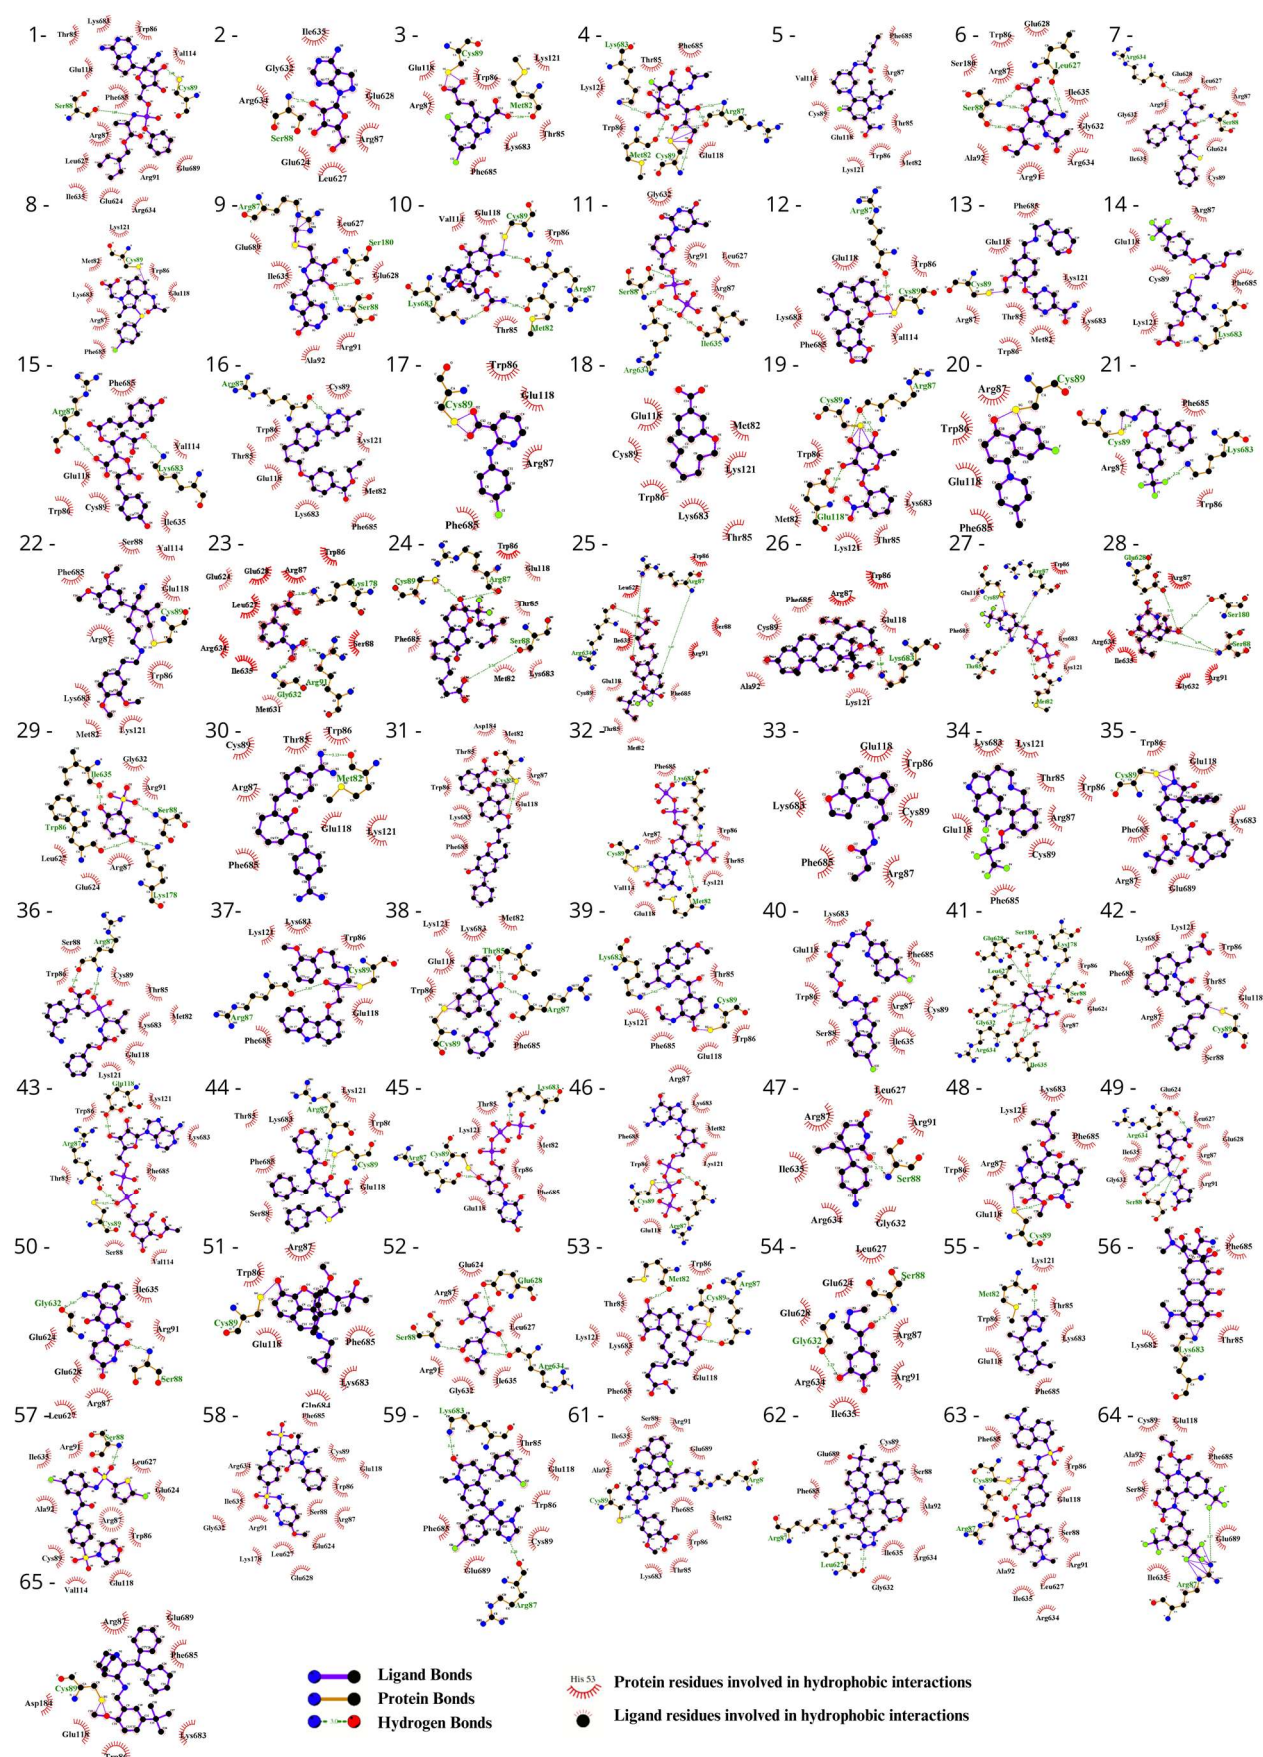

**Figure S4.** Evaluation in Ligplot of the 65 ligands found in the initial screening at the highest affinity position in docking with the CYFIP2 Arg87Cys protein against the CYFIP2 WT protein. The numbers follow the molecules IDs in table S2.



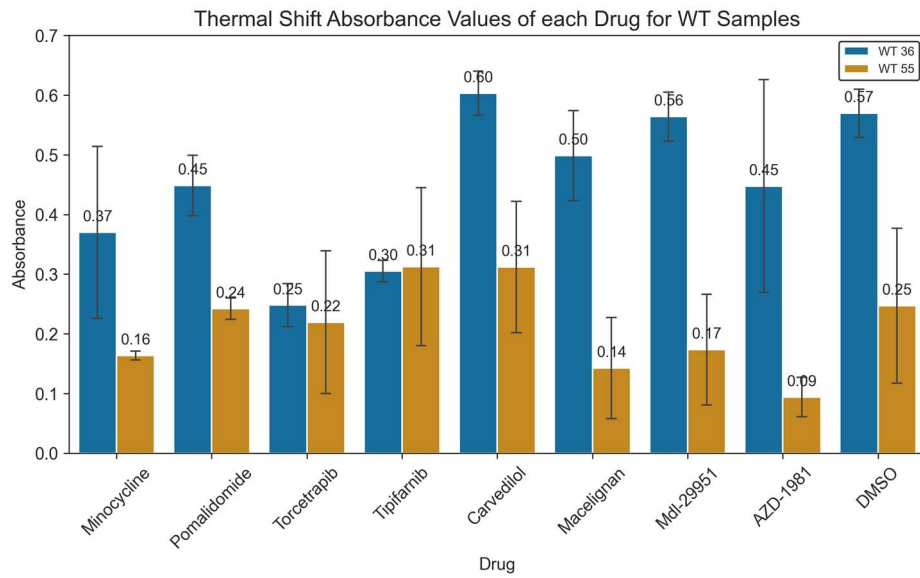

**Figure S5.** Average absorbance values measured in our adapted thermal shift assay for each drug group in the CYFIP2 WT samples. The error bars represent the standard deviation of the average between the two biological replicates.

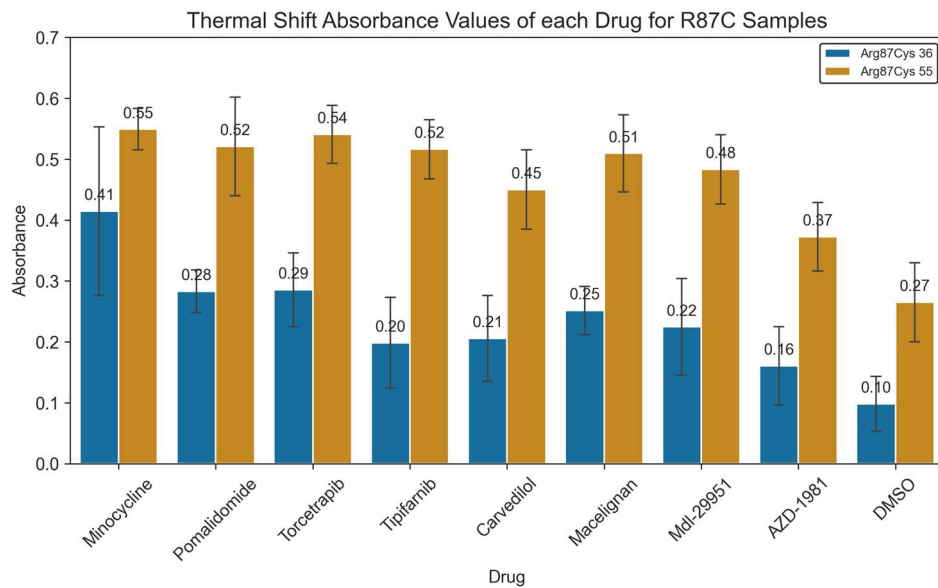

**Figure S6.** Average absorbance values measured in our adapted thermal shift assay for each drug group in the CYFIP2 Arg87Cys samples. The error bars represent the standard deviation of the average between the two biological replicates.
